# Supplementary material for: HGK-sestrin 2 signaling-mediated autophagy contributes to antitumor efficacy of Tanshinone IIA in human osteosarcoma cells
Source: PubMed Central journal article supplement (PMC6158215; doi:10.1038/s41419-018-1016-9), 2018-09-26
Supplement: 41419_2018_1016_MOESM1_ESM.pdf [file 41419_2018_1016_MOESM1_ESM.pdf]

## Supplementary Tables

**Supplementary Table 1. Characteristics of bone cancer patients according to use of Chinese herb and non-used before frequency matching.**

| Variable                                                                           | Bone cancer patients |       |                        |       | p-value |
|------------------------------------------------------------------------------------|----------------------|-------|------------------------|-------|---------|
|                                                                                    | Non-TCM (n =673)     |       | Using Danshen (n =159) |       |         |
|                                                                                    | n                    | %     | n                      | %     |         |
| <b>Gender</b>                                                                      |                      |       |                        |       | <.0001  |
| Female                                                                             | 234                  | 34.77 | 87                     | 54.72 |         |
| Male                                                                               | 439                  | 65.23 | 72                     | 45.28 |         |
| <b>Age group</b>                                                                   |                      |       |                        |       | <.0001  |
| 0-18                                                                               | 124                  | 18.42 | 22                     | 13.84 |         |
| 18-39                                                                              | 115                  | 17.09 | 51                     | 32.08 |         |
| 40-59                                                                              | 217                  | 32.24 | 18                     | 11.32 |         |
| ≥60                                                                                | 217                  | 32.24 | 68                     | 42.77 |         |
| Mean±SD ( years) <sup>a</sup>                                                      | 48.86(24.57)         |       | 41.54(19.07)           |       | <.0001  |
| <b>Follow time, years (mean, median)</b>                                           | 1.64(0.67)           |       | 4.13(3.07)             |       |         |
| <b>Interval between onset of cancer and the first using TCM date, day (median)</b> | 459(175)             |       | 1326(898)              |       | <.0001  |

\*Chi-Square Test;<sup>a</sup> t test

**Supplementary Table 2. Characteristics of bone cancer patients according to use of Chinese herb and non-used after frequency matching.**

| Variable                                                                           | Bone cancer patients |       |                       |       | p-value             |
|------------------------------------------------------------------------------------|----------------------|-------|-----------------------|-------|---------------------|
|                                                                                    | Non-TCM (n =22)      |       | Using Danshen (n =22) |       |                     |
|                                                                                    | n                    | %     | n                     | %     |                     |
| <b>Gender</b>                                                                      |                      |       |                       |       | 0.99*               |
| Female                                                                             | 12                   | 54.55 | 12                    | 54.55 |                     |
| Male                                                                               | 10                   | 45.45 | 10                    | 45.45 |                     |
| <b>Age group</b>                                                                   |                      |       |                       |       | 0.99*               |
| 18-39                                                                              | 7                    | 31.82 | 7                     | 31.82 |                     |
| 40-59                                                                              | 11                   | 50.00 | 11                    | 50.00 |                     |
| ≥60                                                                                | 4                    | 18.18 | 4                     | 18.18 |                     |
| Mean±SD ( years) <sup>a</sup>                                                      | 51.30 (16.17)        |       | 51.68 (16.45)         |       | 0.9423 <sup>a</sup> |
| <b>Follow time, years (mean, median)</b>                                           | 1.16 (0.62)          |       | 4.65 (2.46)           |       |                     |
| <b>Interval between onset of cancer and the first using TCM date, day (median)</b> | 157                  |       | 194                   |       | 0.8392 <sup>a</sup> |

\*Chi-Square Test;<sup>a</sup> t test

### Supplementary Table 3. Sequencing of primers.

#### Primers qPCR

| Human Gene     | Forward                                  | Reverse                               |
|----------------|------------------------------------------|---------------------------------------|
| SESN2          | 5'- GAC CAT GGC TAC TCG CTG AT<br>-3'    | 5'- GCT GCC TGG AAC TTC TCA TC<br>-3' |
| HIF-1 $\alpha$ | 5'- AAA CTT GGC AAC CTT GGA TTG<br>G -3' | 5'- TCC GTC CCT CAA CCT CTC AG<br>-3' |
| catalase       | 5'- ACT TCT GGA GCC TAC GTC CT<br>-3'    | 5'- TCT GGA ATC CCC CGA TCA CT<br>-3' |
| MnSOD          | 5'- AGC GGC TTC AGC AGA TCG -3'          | 5'- AGA TAC CCC AAA ACC GGA GC<br>-3' |
| GPX1           | 5'- GCG GCC CAG TCG GTG -3'              | 5'- CAG AGG GAC GCC ACA TTC TC<br>-3' |

#### Primers ChIP

| Promoter | Forward                            | Reverse                            |
|----------|------------------------------------|------------------------------------|
| SESN2    | 5'- AAA AGG GTC AGA TAA AAC AT -3' | 5'- TTA GTA AAT AGA GAC AGG GT -3' |
